# Supplementary material for: Palladium nanoparticles embedded in metal–organic framework derived porous carbon: synthesis and application for efficient Suzuki–Miyaura coupling reactions
Source: Royal Society of Chemistry journal article supplement (doi:10.1039/c6ra00378h), 2016-01-01
Supplement: c6ra00378h1.pdf [file c6ra00378h1.pdf]

**ELECTRONIC SUPPORTING INFORMATION (ESI)**

**Palladium Nanoparticle Embedded in Metal Organic Framework  
Derived Porous Carbon: Synthesis and Application for Efficient  
Suzuki-Miyaura Coupling Reaction**

Wenhuan Dong<sup>†,1</sup>, Li Zhang<sup>†,1</sup>, Chenhuan Wang<sup>2</sup>, Cheng Feng<sup>1\*</sup>, Ningzhao Shang<sup>1</sup>, Shutao Gao<sup>1</sup>,

Chun Wang<sup>1\*</sup>

College of Science, Agricultural University of Hebei, Baoding 071001, China

College of Environmental and Chemical Engineering, Yanshan University, Qinhuangdao 066004, China

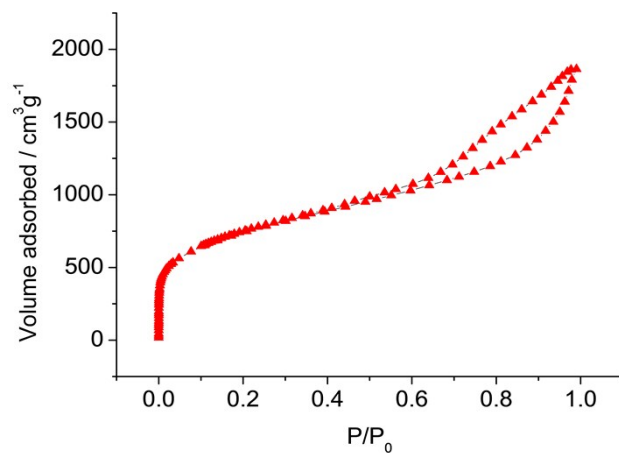

Fig. S1 The nitrogen adsorption-desorption isotherms of Zn-free MOF-5-NPC-900.

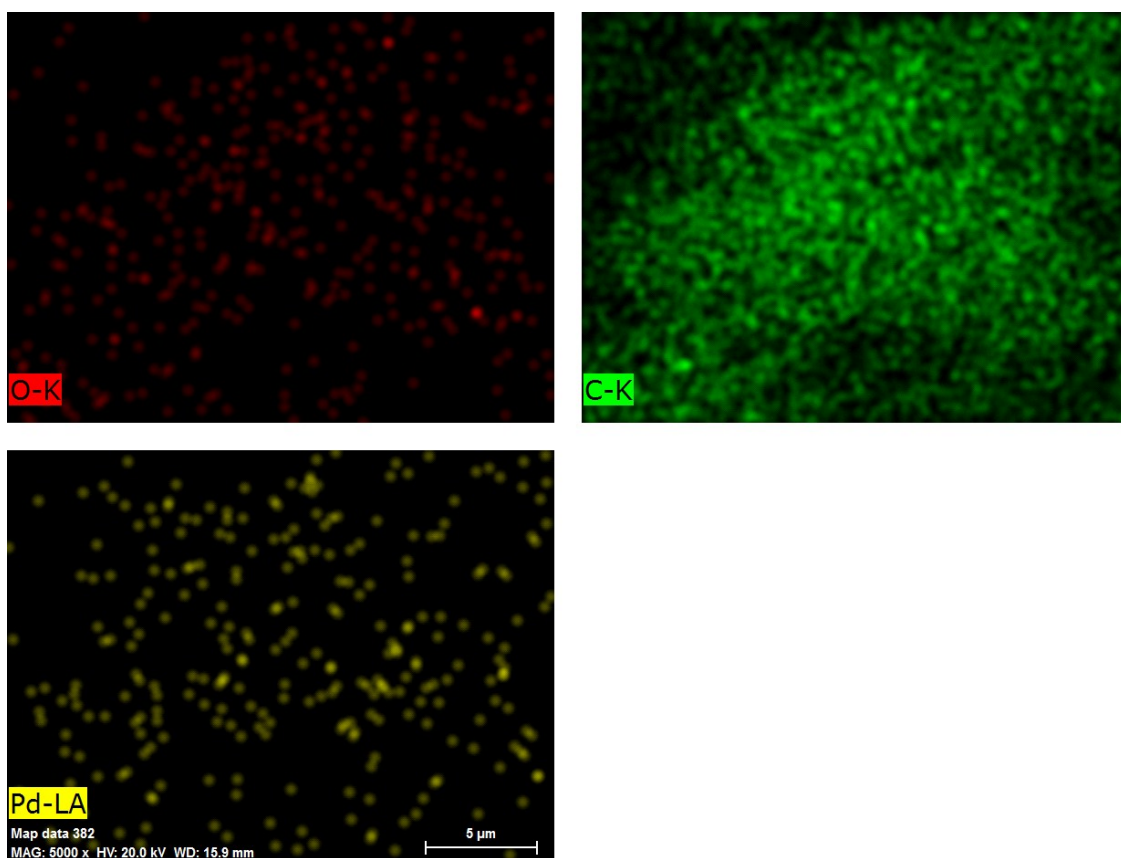

Fig. S2 Element mappings images of Zn-free MOF-5-NPC-900-Pd.

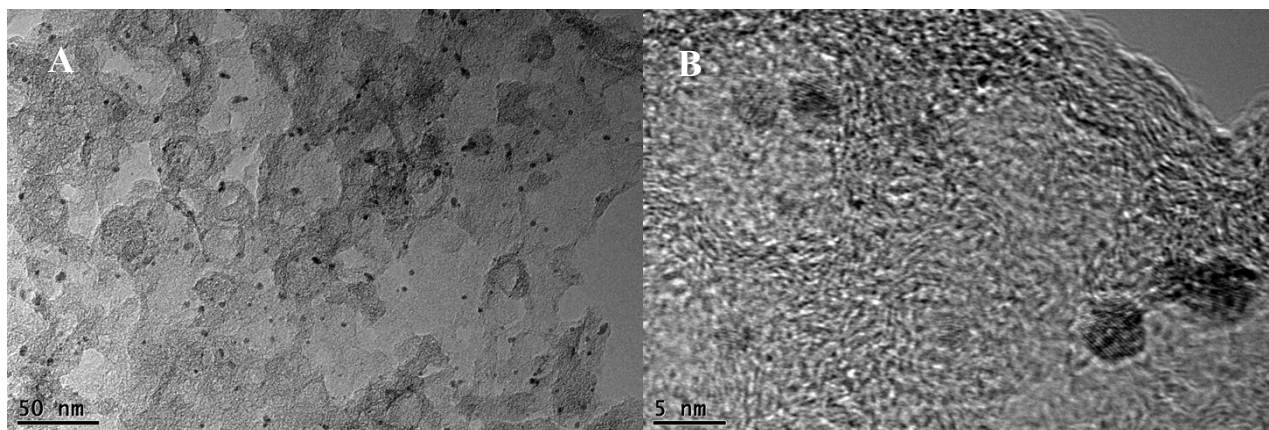

Fig. S3 TEM (A) and HRTEM (B) images of the catalyst after 5 cycles.

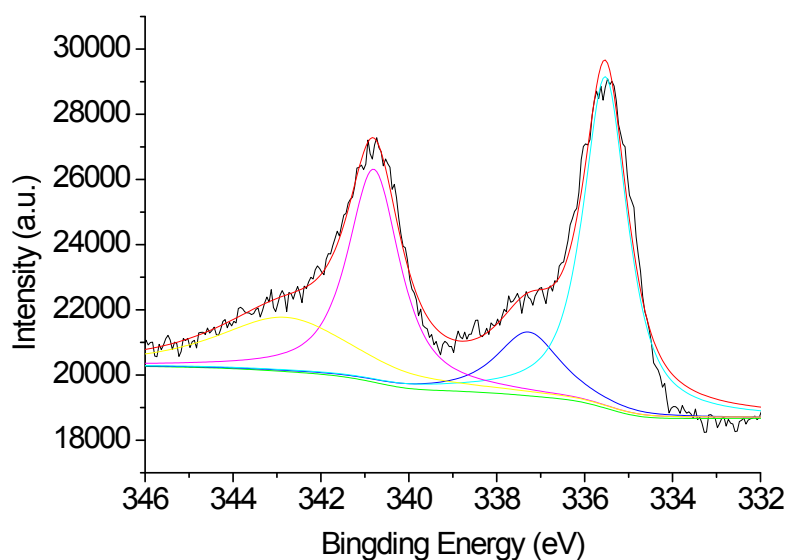

Fig. S4 XPS image of the catalyst after 5 cycles.

#### NMR data of the obtained products:

**Biphenyl:**  $^1\text{H}$  NMR (400 MHz,  $\text{CDCl}_3$ ):  $\delta = 7.64$  (d, 4H,  $J = 7.32$  Hz, ArH),  $\delta = 7.49$  (t, 4H,  $J = 7.23$  Hz, ArH),  $\delta = 7.39$  (d, 2H,  $J = 6.72$  Hz, ArH).

**4-Methoxybiphenyl:**  $^1\text{H}$ NMR (400 MHz,  $\text{CDCl}_3$ ):  $\delta = 7.57$ - $7.51$  (m, 4H, ArH),  $\delta = 7.48$  (t, 2H,  $J = 7.37$  Hz, ArH),  $\delta = 7.31$  (t, 1H,  $J = 7.31$  Hz, ArH),  $\delta = 6.92$  (d, 2H,  $J = 8.73$  Hz, ArH),  $\delta = 3.88$  (s, 3H,  $-\text{OCH}_3$ ).

**4-Hydroxybiphenyl:**  $^1\text{H}$  NMR (400 MHz,  $\text{CDCl}_3$ ):  $\delta = 7.61$  (d, 2H,  $J = 7.27$  Hz, ArH),  $\delta = 7.51$  (d, 2H,  $J = 8.45$  Hz, ArH),  $\delta = 7.41$  (t, 2H,  $J = 7.46$  Hz, ArH),  $\delta = 7.32$  (t, 1H,  $J = 7.33$  Hz, ArH),  $\delta = 6.9$  (d, 2H,  $J = 8.5$  Hz, ArH),  $\delta = 4.82$  (s, 1H,  $-\text{OH}$ ).

**4-Hydroxy-2'-methylbiphenyl:**  $^1\text{H}$  NMR (400 MHz,  $\text{CDCl}_3$ ):  $\delta = 7.54$  (d, 2H,  $J = 7.29$  Hz, ArH),  $\delta = 7.45$  (d, 2H,  $J = 8.35$  Hz, ArH),  $\delta = 7.35$ -7.29 (m, 4H, ArH),  $\delta = 4.85$  (s, 1H, -OH),  $\delta = 2.58$  (s, 3H, - $\text{CH}_3$ ).

**2-Methylbiphenyl.**  $^1\text{H}$  NMR (400 MHz,  $\text{CDCl}_3$ ):  $\delta = 7.63$  (d, 2H,  $J = 7.64$  Hz, ArH),  $\delta = 7.45$ -7.39 (m, 4H, ArH),  $\delta = 7.35$ -7.29 (m, 2H, ArH),  $\delta = 7.28$  (d, 1H,  $J = 7.02$  Hz, ArH),  $\delta = 2.56$  (s, 3H, - $\text{CH}_3$ ).

**4'-Methyl-4-nitro-biphenyl:**  $^1\text{H}$  NMR (400 MHz,  $\text{CDCl}_3$ ):  $\delta = 8.28$  (d,  $J = 8.6$  Hz, 2H, ArH),  $\delta = 7.72$  (d,  $J = 8.6$  Hz, 2H, ArH),  $\delta = 7.53$  (d,  $J = 7.9$  Hz, 2H, ArH),  $\delta = 7.31$  (d,  $J = 7.8$  Hz, 2H, ArH),  $\delta = 2.43$  (s, 3H, - $\text{CH}_3$ ).

**4-methoxy-4'-nitrobiphenyl:**  $^1\text{H}$  NMR (400 MHz,  $\text{CDCl}_3$ ):  $\delta = 7.04$  (2H, d,  $J = 8.7$  Hz, ArH),  $\delta = 7.61$  (2H, d,  $J = 8.8$  Hz, ArH),  $\delta = 7.72$  (2H, d,  $J = 8.8$  Hz, ArH),  $\delta = 8.30$  (2H, d,  $J = 8.7$  Hz, ArH),  $\delta = 3.90$  (s, 3H,  $\text{OCH}_3$ ).

**1-(Biphenyl-4-yl)ethanone:**  $^1\text{H}$  NMR (400 MHz,  $\text{CDCl}_3$ ):  $\delta = 8.12$  (d, 2H,  $J = 8.19$  Hz),  $\delta = 7.62$  (d, 2H,  $J = 8.41$  Hz, ArH),  $\delta = 7.58$  (d, 2H,  $J = 7.25$  Hz, ArH),  $\delta = 7.50$ -7.43 (m, 2H, ArH),  $\delta = 7.42$ -7.39 (m, 1H),  $\delta = 2.57$  (s, 3H, - $\text{CH}_3$ ).

**4-Hydroxy-3'-methylbiphenyl:**  $^1\text{H}$  NMR (400 MHz,  $\text{CDCl}_3$ ):  $\delta = 7.56$  (d, 2H,  $J = 7.26$  Hz, ArH),  $\delta = 7.48$  (d, 2H,  $J = 8.31$  Hz, ArH),  $\delta = 7.40$  (s, 1H, ArH),  $\delta = 7.31$ -7.22 (m, 3H, ArH),  $\delta = 4.83$  (s, 1H, -OH),  $\delta = 2.57$  (s, 3H, - $\text{CH}_3$ ).

**4-carbaldehydebiphenyl:**  $^1\text{H}$  NMR (400 MHz,  $\text{CDCl}_3$ ):  $\delta = 10.09$  (s, 1H, -CHO),  $\delta = 7.99$  (d,  $J = 8.0$  Hz, 2H, ArH),  $\delta = 7.79$  (d,  $J = 8$  Hz, 2H, ArH),  $\delta = 7.67$  (d,  $J = 7.2$  Hz, 2H, ArH),  $\delta = 7.52$  (t,  $J = 6.8$  Hz, 2H, ArH),  $\delta = 7.45$  (t,  $J = 7.2$  Hz, 1H, ArH).

**4-carbaldehyde-4'-nitrobiphenyl:**  $^1\text{H}$  NMR (400 MHz,  $\text{CDCl}_3$ ):  $\delta = 10.15$  (s, 1H, -CHO),  $\delta = 8.45$  (d,  $J = 8.7$  Hz, 2H, ArH),  $\delta = 8.24$  (d,  $J = 8.7$  Hz, 2H, ArH),  $\delta = 8.04$  (d,  $J = 8.5$  Hz, 2H, ArH),  $\delta = 7.78$  (t,  $J = 8.4$  Hz, 2H, ArH).

**1-(4'-nitroBiphenyl-4-yl)ethanone:**  $^1\text{H}$  NMR (400 MHz,  $\text{CDCl}_3$ ):  $\delta = 8.15$  (d, 2H,  $J = 8.21$  Hz),  $\delta = 7.64$  (d, 2H,  $J = 8.43$  Hz, ArH),  $\delta = 7.75$  (t,  $J = 8.4$  Hz, 2H, ArH),  $\delta = 7.55$  (d, 2H,  $J = 8.20$  Hz, ArH),  $\delta = 2.55$  (s, 3H, - $\text{CH}_3$ ).
